# Supplementary material for: Twelve-month outcomes of a randomized trial of a moderate-carbohydrate versus very low-carbohydrate diet in overweight adults with type 2 diabetes mellitus or prediabetes
Source: PubMed Central journal article supplement (PMC5865541; doi:10.1038/s41387-017-0006-9), 2017-12-21
Supplement: 41387_2017_6_MOESM2_ESM.pdf [file 41387_2017_6_MOESM2_ESM.pdf]

Assessed for eligibility through  
online survey ( $n = 118$ )

## Enrollment

Excluded ( $n = 84$ )

- ◆ Did not meet inclusion criteria based on online survey ( $n = 27$ )
- ◆ Did not meet inclusion criteria based on follow-up phone call or not interested after phone call ( $n = 48$ )
- ◆ Did not meet inclusion criteria based on blood work ( $n = 6$ )
- ◆ Failed to appear for baseline measurement meeting ( $n = 3$ )

Randomized ( $n = 34$ )

## Allocation

Allocated to MCCR group ( $n = 18$ )

- ◆ Received allocated intervention ( $n = 17$ )
- ◆ Did not receive allocated intervention (moved away before classes finished) ( $n = 1$ )

Allocated to LCK group ( $n = 16$ )

- ◆ Received allocated intervention ( $n = 15$ )
- ◆ Did not receive allocated intervention (moved away before classes finished) ( $n = 1$ )

## Follow-Up

More lost to follow-up (cited work schedules and/or family responsibilities as reasons, participated in classes up to this point)

More lost to follow-up (cited work schedule and/or family responsibilities as reasons, participated in classes up to this point)

## Analysis

Analysed

- ◆ Intention to treat analysis (6 months:  $n = 15$ , 12 months:  $n = 14$ )

Analysed

- ◆ Intention to treat analysis (6 months:  $n = 16$ , 12 months:  $n = 15$ )
