# Supplementary material for: Twelve-month outcomes of a randomized trial of a moderate-carbohydrate versus very low-carbohydrate diet in overweight adults with type 2 diabetes mellitus or prediabetes
Source: PubMed Central journal article supplement (PMC5865541; doi:10.1038/s41387-017-0006-9), 2017-12-21

Moderate Carbohydrate

Very Low-Carbohydrate

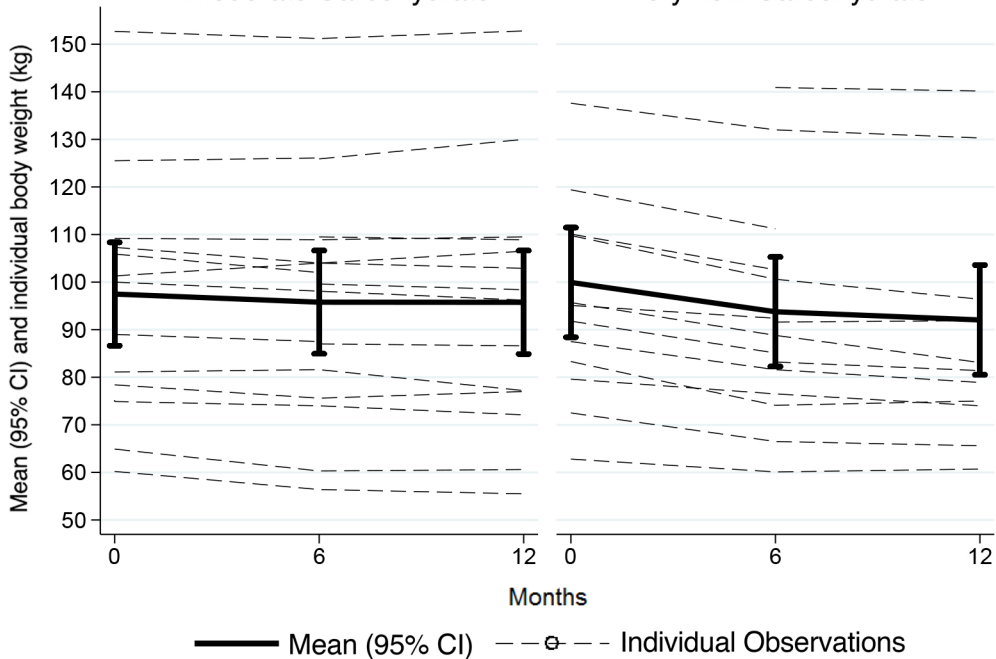

Supplement: 41387_2017_6_MOESM3_ESM.pdf [file 41387_2017_6_MOESM3_ESM.pdf]
